# Supplementary material for: Structural Features of Sulfated Glucuronomannan Oligosaccharides and Their Antioxidant Activity
Source: PubMed Central journal article supplement (PMC6165275; doi:10.3390/md16090291), 2018-08-21
Supplement: marinedrugs-16-00291-s001.pdf [file marinedrugs-16-00291-s001.pdf]

**Supplementary data**

**Table S1** The chemical shifts of G4 and G6

| Samples | Residues          | C1    | C2   | C3   | C4   | C5   | C6    | H1   | H2   | H3   | H4   | H5   | H6        |
|---------|-------------------|-------|------|------|------|------|-------|------|------|------|------|------|-----------|
| G4      | →2)-α-D-Manp-OH   | 92.5  | 78.6 | 69.8 | 67.4 | 72.7 | 60.8  | 5.14 | 3.91 | 3.73 | 3.54 | 3.58 | 3.63-3.68 |
|         | →4)-β-D-GlcAp-(1→ | 102.0 | 73.0 | 76.7 | 77.2 | 76.5 | 175.4 | 4.37 | 3.23 | 3.52 | 3.62 | 3.66 | -         |
|         | →2)-α-D-Manp-(1→  | 98.8  | 77.9 | 69.9 | 66.8 | 72.9 | 60.4  | 5.28 | 4.05 | 3.71 | 3.58 | 3.58 | 3.63-3.68 |
|         | β-D-GlcAp-(1→     | 101.8 | 73.1 | 75.6 | 72.2 | 76.2 | 176.2 | 4.33 | 3.28 | 3.38 | 3.62 | 3.64 | -         |
| G6      | →2)-α-D-Manp-OH   | 92.5  | 78.6 | 69.8 | 67.4 | 72.7 | 60.9  | 5.14 | 3.91 | 3.71 | 3.52 | 3.58 | 3.64-3.68 |
|         | →4)-β-D-GlcAp-(1→ | 102.0 | 73.0 | 76.5 | 77.2 | 76.8 | 175.4 | 4.36 | 3.26 | 3.52 | 3.63 | 3.64 | -         |
|         | →2)-α-D-Manp-(1→  | 98.8  | 77.8 | 69.9 | 66.8 | 72.9 | 60.4  | 5.27 | 4.02 | 3.71 | 3.58 | 3.58 | 3.64-3.68 |
|         | →4)-β-D-GlcAp-(1→ | 101.8 | 73.1 | 76.4 | 77.1 | 76.7 | 175.5 | 4.33 | 3.26 | 3.52 | 3.63 | 3.64 | -         |
|         | →2)-α-D-Manp-(1→  | 98.8  | 78.0 | 69.9 | 66.9 | 73.0 | 60.4  | 5.27 | 4.05 | 3.71 | 3.58 | 3.58 | 3.64-3.68 |
|         | β-D-GlcAp-(1→     | 101.8 | 73.1 | 75.6 | 72.2 | 76.3 | 176.3 | 4.33 | 3.28 | 3.38 | 3.62 | 3.64 | -         |

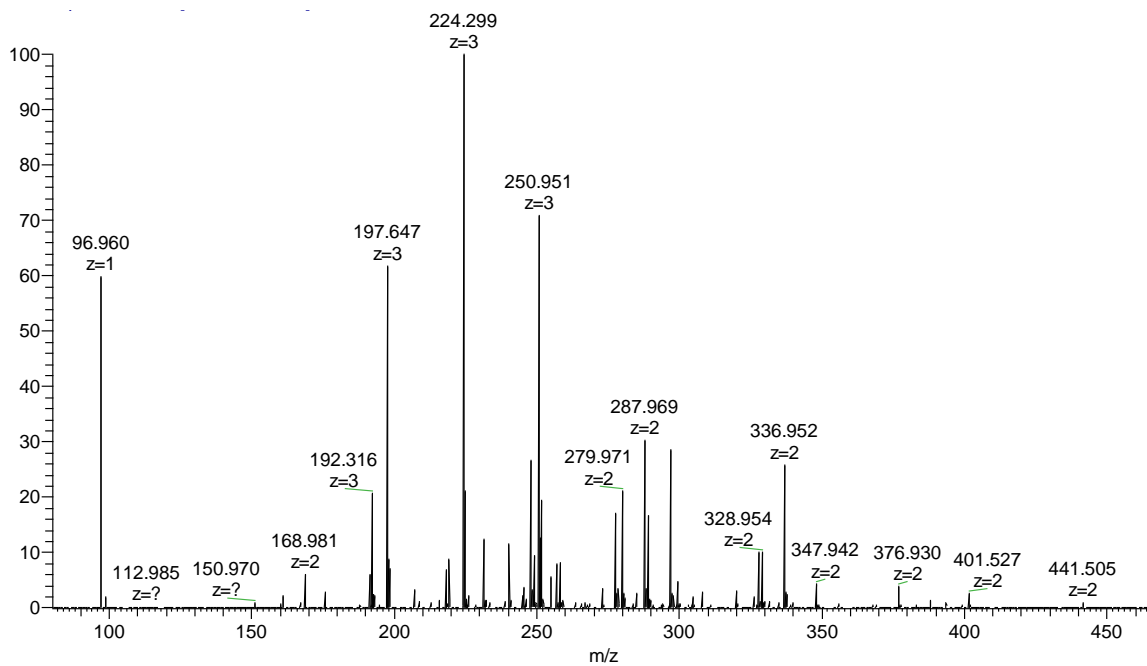

**Figure S1** Negative-ion mode ESI-MS spectrum of G2S1.

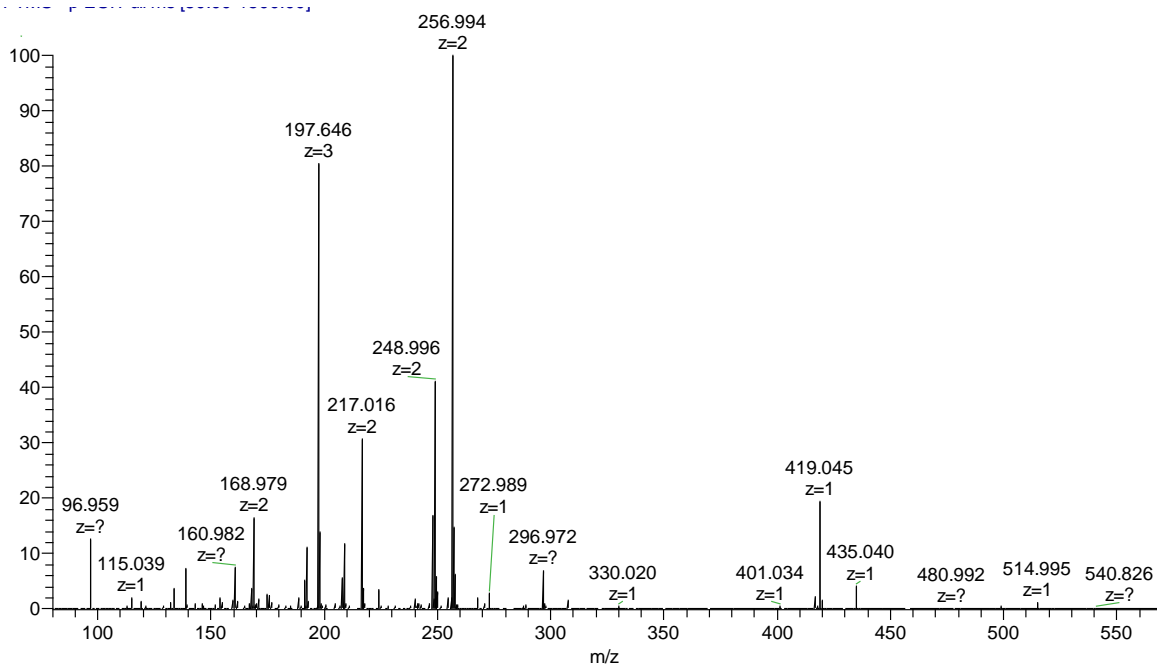

**Figure S2** Negative-ion mode ESI-MS spectrum of G2S2.

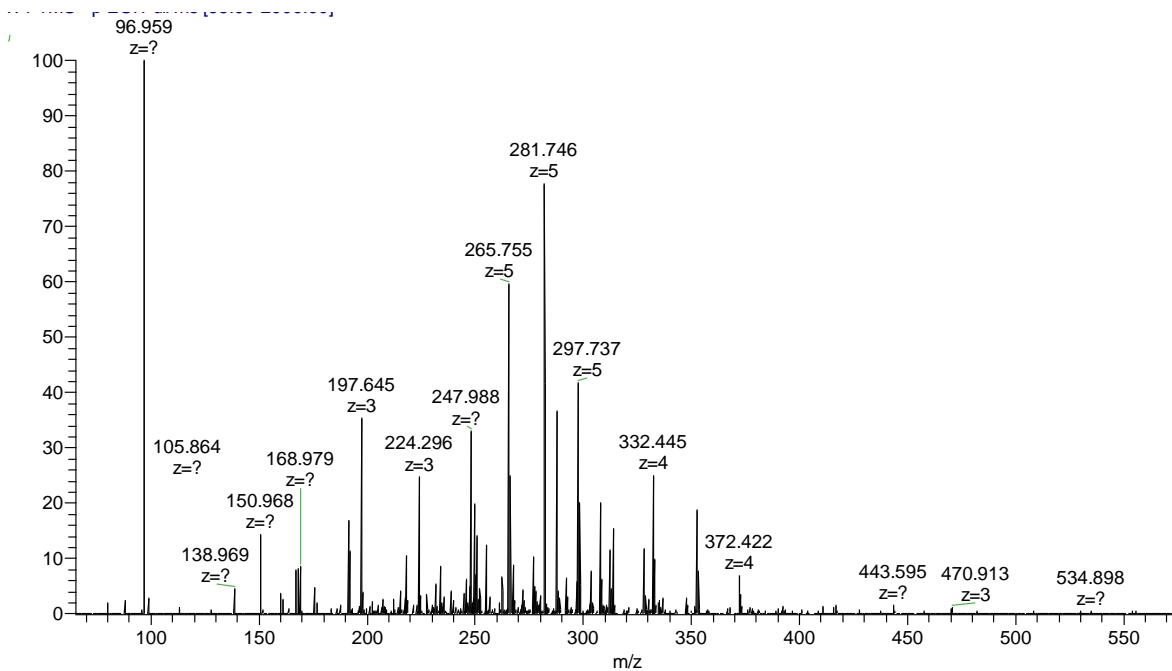

**Figure S3** Negative-ion mode ESI-MS spectrum of G4S1.

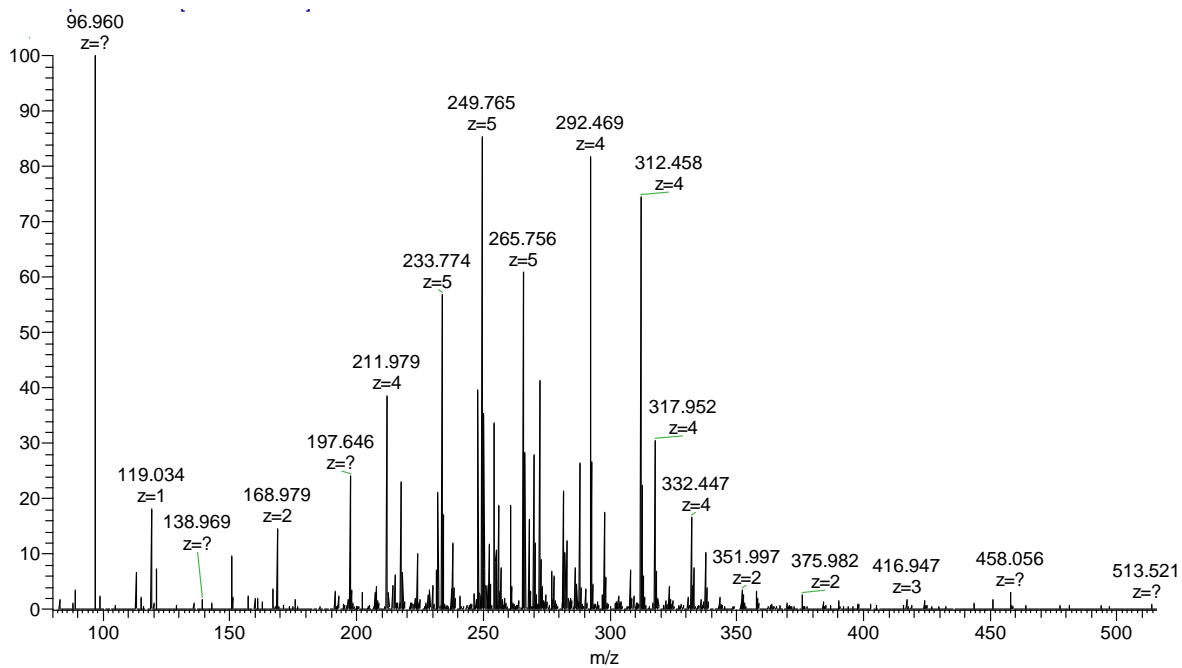

**Figure S4** Negative-ion mode ESI-MS spectrum of G4S2.

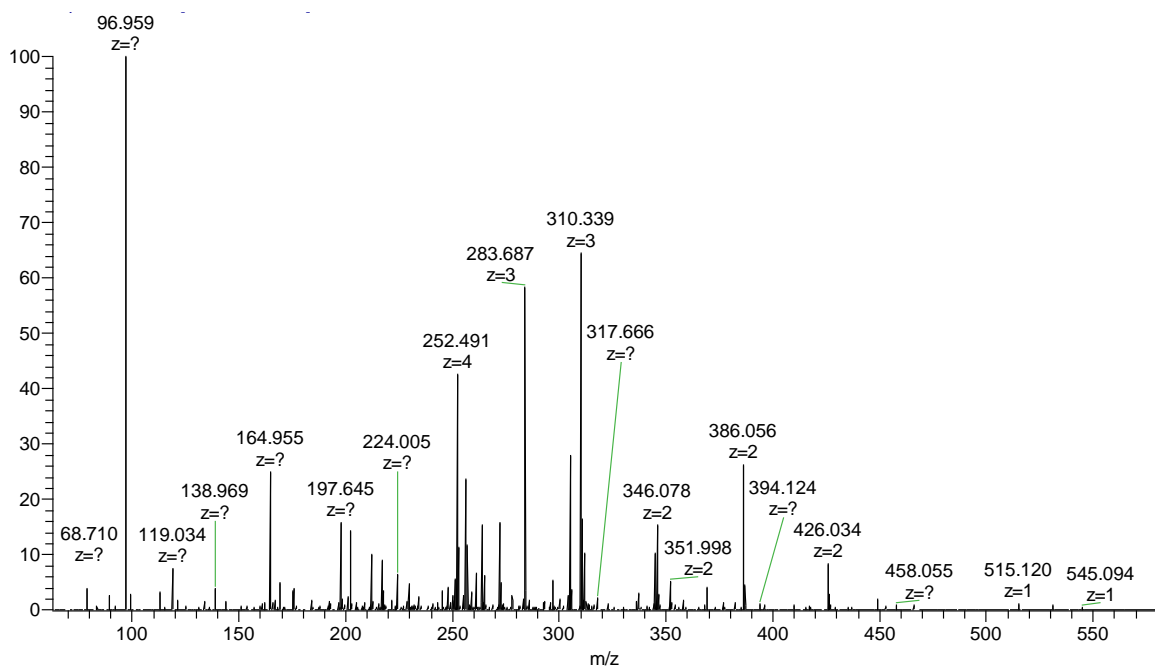

**Figure S5** Negative-ion mode ESI-MS spectrum of G4S3.

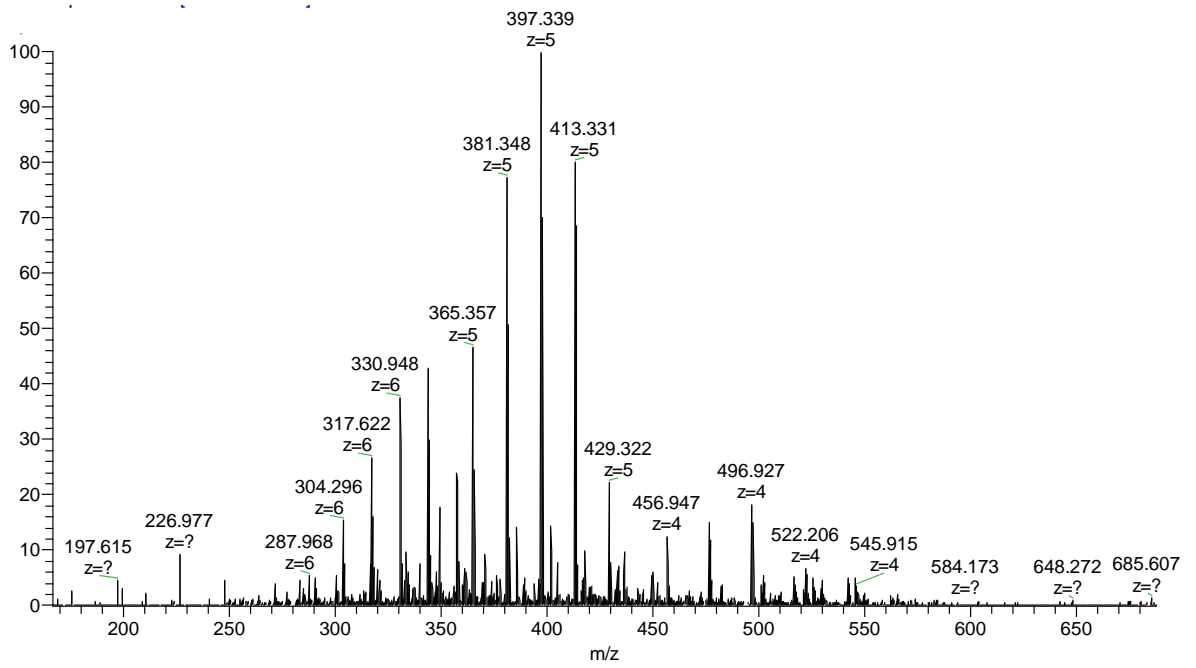

**Figure S6** Negative-ion mode ESI-MS spectrum of G6S1.

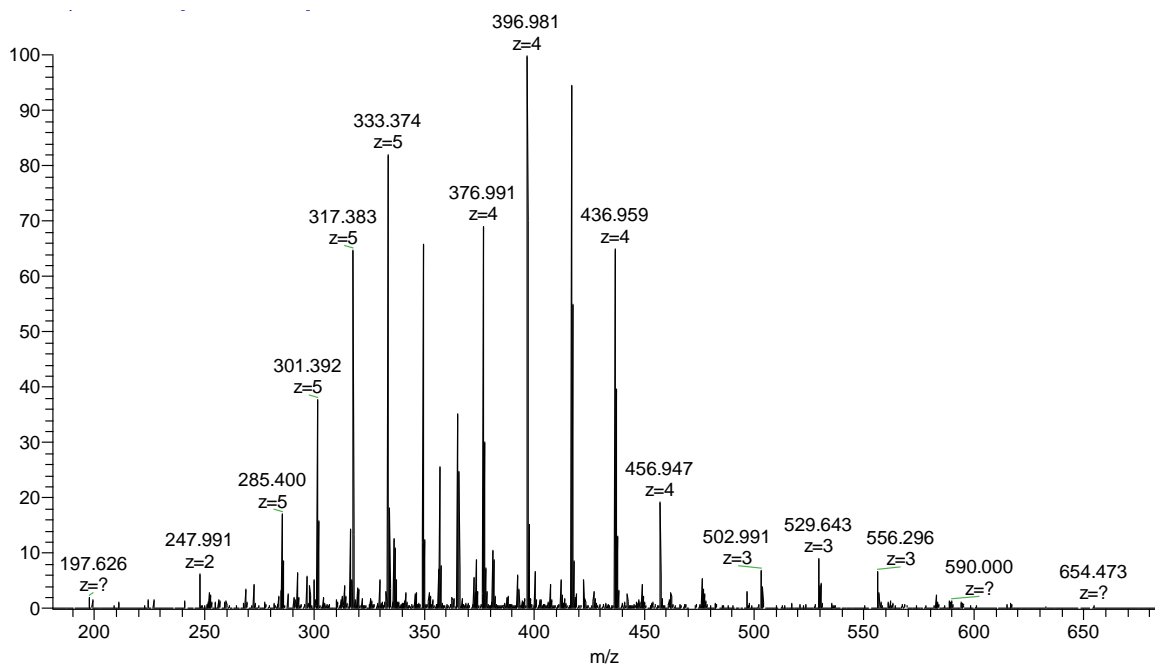

**Figure S7** Negative-ion mode ESI-MS spectrum of G6S2.



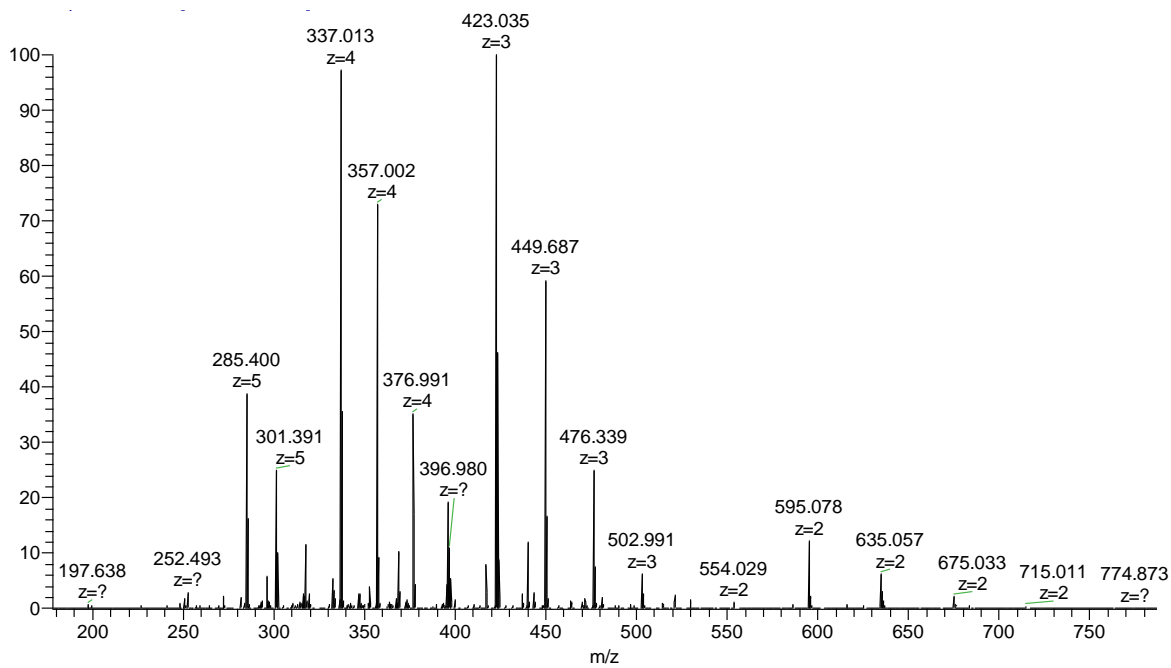

**Figure S8** Negative-ion mode ESI-MS spectrum of G6S3.

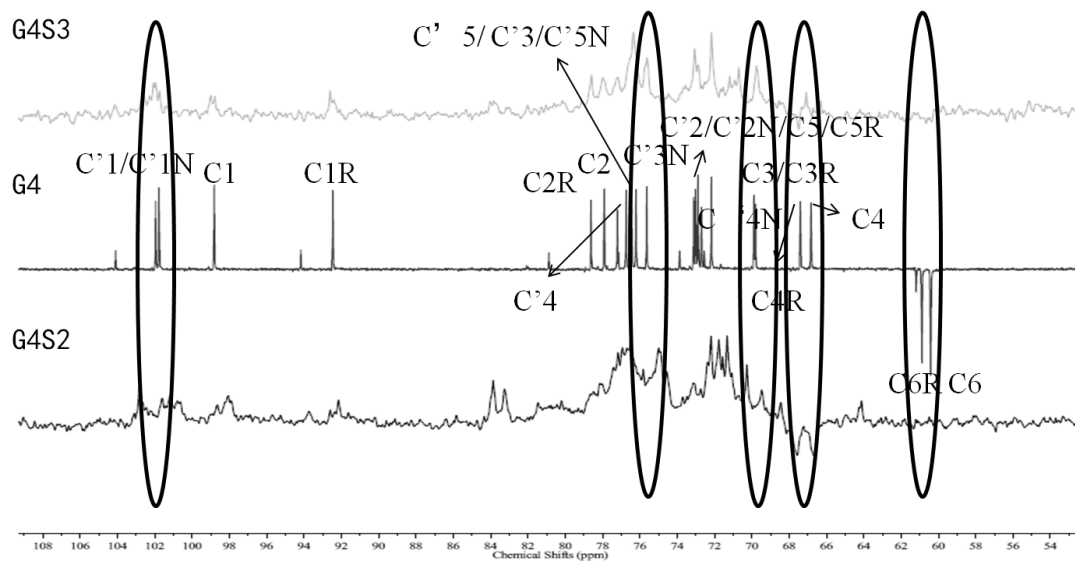

**Fig. S9** The DEPTQ spectra of a glucuronomannan-tetramer (G4), its low sulfated fraction (G4S3) and its medium sulfated fraction (G4S2).
